# Supplementary material for: Mechanism of collagen folding propagation studied by Molecular Dynamics simulations
Source: PubMed Central journal article supplement (PMC8224937; doi:10.1371/journal.pcbi.1009079), 2021-06-08
Supplement: pcbi.1009079.s001.pdf [file pcbi.1009079.s001.pdf]

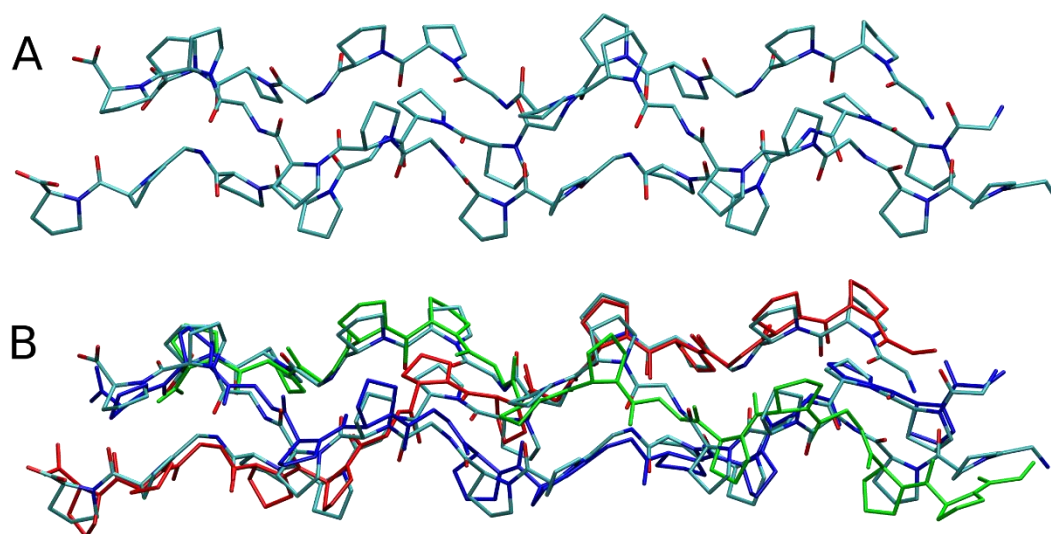

**S1\_Fig.** (A) Structure of a folded triple helix peptide of 3 x (Gly-Pro-Pro)<sub>5</sub> sequence. (B) Superposition of crystal structure (light blue) and final peptide (each chain in different color) after folding simulation.
