# Supplementary material for: Mechanism of collagen folding propagation studied by Molecular Dynamics simulations
Source: PubMed Central journal article supplement (PMC8224937; doi:10.1371/journal.pcbi.1009079), 2021-06-08
Supplement: pcbi.1009079.s002.pdf [file pcbi.1009079.s002.pdf]

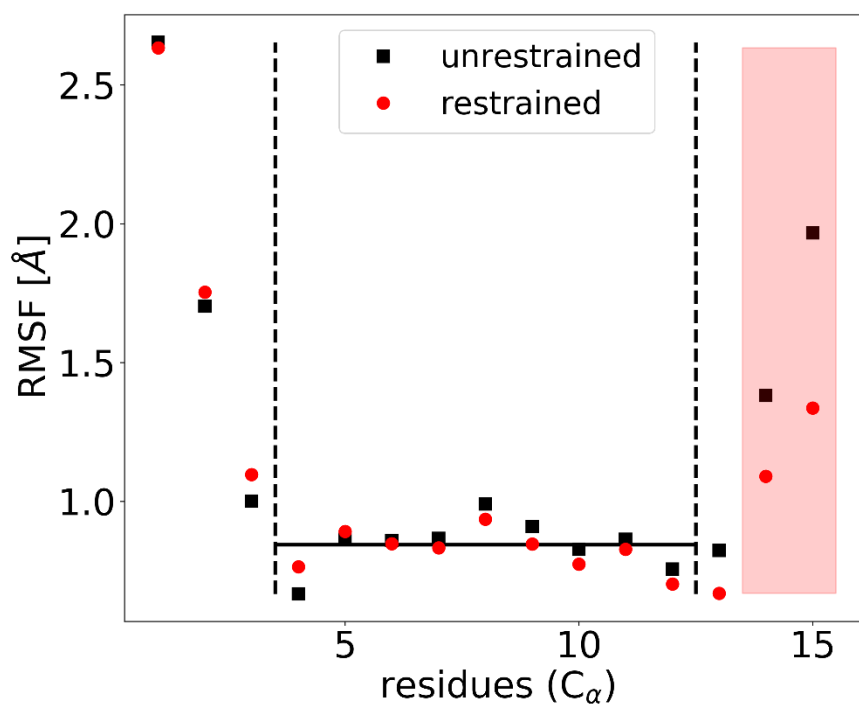

**S2\_Fig.** Root Mean Square Fluctuations (RMSF) of an unrestrained and a restrained triple helix: The black squares represent the RMSF of the C $\alpha$  atoms of the residues along the helix (mean of three residues, one of each strand). The N-terminus (left) and the C-terminus (right) show increased flexibility. The red circles represent the RMSF of a triple helix which was restrained on the two terminal residues at the C-terminus (red area). Clearly visible is that the restrained C-terminus is less flexible than the unrestrained terminus, but still more flexible than the middle part of the helix (between the dashed lines).
