# Supplementary material for: Mechanism of collagen folding propagation studied by Molecular Dynamics simulations
Source: PubMed Central journal article supplement (PMC8224937; doi:10.1371/journal.pcbi.1009079), 2021-06-08
Supplement: pcbi.1009079.s003.pdf [file pcbi.1009079.s003.pdf]

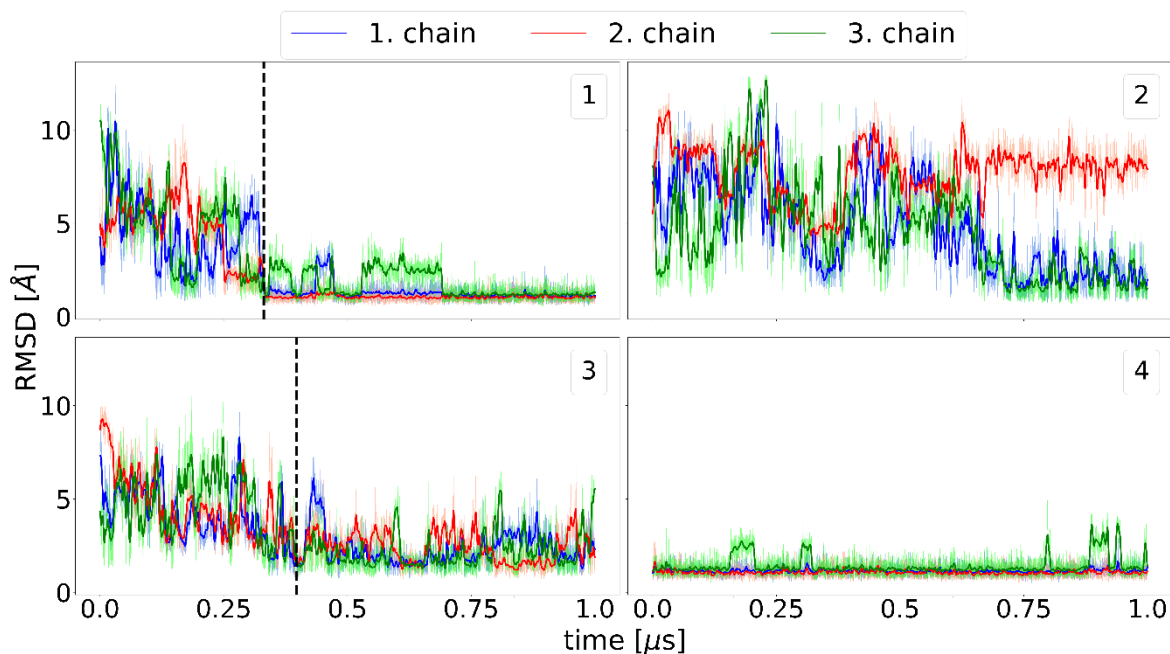

**S3\_Fig.** RMSD of individual chains (with respect to the native collagen structure) vs. simulation time for 3 folding simulations (1-3) and one simulation starting from foled triple helix (4). The RMSD of each strand is visualized separately (blue, red, green). The thicker line shows the smoothed data (Gaussian filter,  $\sigma=25$ ). The vertical dashed line marks the time point of (first) folding (RMSD of all chains below 2 Å). Example 1 indicates a successful folding of the wild type sequence. One chain in example 2 formed a loop in the second (red) strand in final part of the simulation and the RMSD of the chain remains at a high level. Example 3 shows a mutant with the 3 central Gly residues replaced by Ala. Although the RMSD temporarily reaches low values, no stable folding is observed. Finally, the 4<sup>th</sup> example shows the simulation starting from the native folded triple helix.
