# Supplementary material for: Mechanism of collagen folding propagation studied by Molecular Dynamics simulations
Source: PubMed Central journal article supplement (PMC8224937; doi:10.1371/journal.pcbi.1009079), 2021-06-08
Supplement: pcbi.1009079.s006.pdf [file pcbi.1009079.s006.pdf]

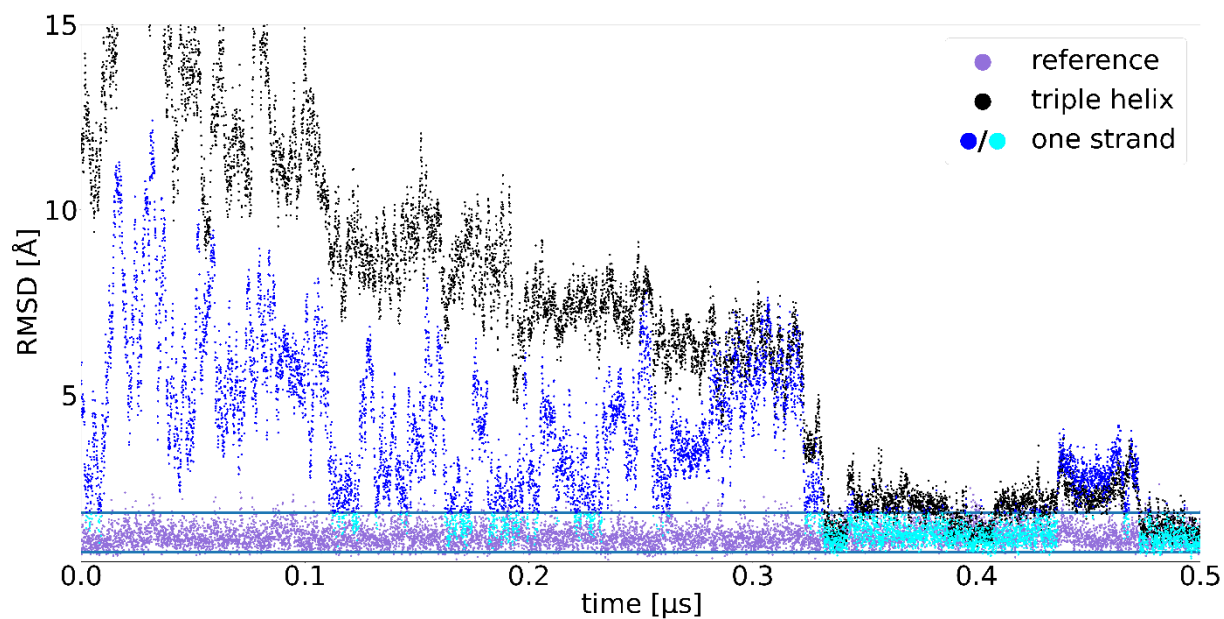

**S6\_Fig.** Root mean square deviation (RMSD) of individual chains during triple helix folding. For an example folding simulation the RMSD (non-hydrogen atoms) with respect to the native triple helical conformation vs. time is indicated (black curve: RMSD vs time of complete structure; violet: simulation starting from the triple helix; dark/light blue: RMSD of separate chains).
