# Supplementary material for: Mechanism of collagen folding propagation studied by Molecular Dynamics simulations
Source: PubMed Central journal article supplement (PMC8224937; doi:10.1371/journal.pcbi.1009079), 2021-06-08
Supplement: pcbi.1009079.s007.pdf [file pcbi.1009079.s007.pdf]

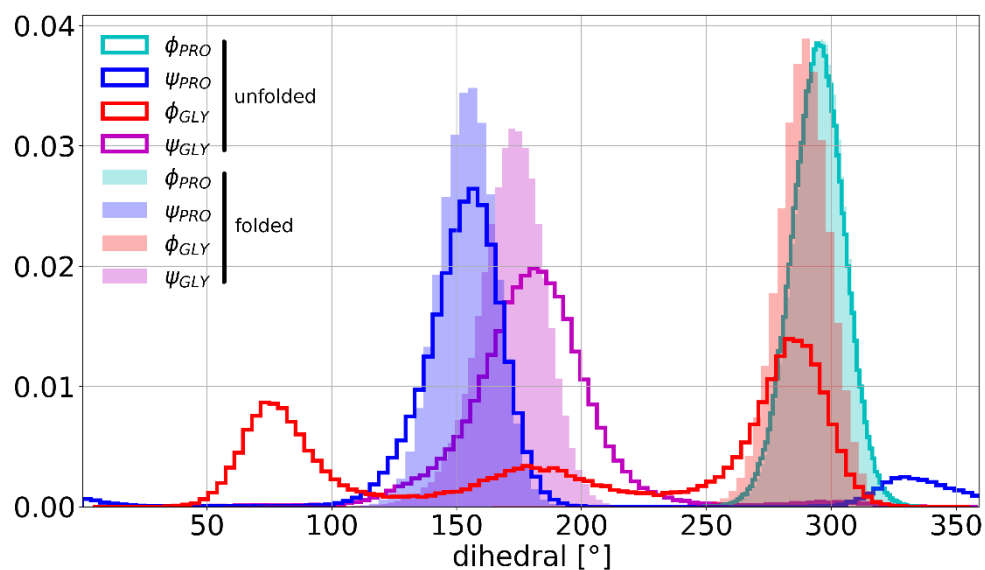

**S7\_Fig.** Distribution of dihedral angles for two cases. In the folded case (filled areas) all angles populate a single state. In an unfolded case (framed areas) especially the  $\phi$ -angle of GLY shows a broad variation. The  $\psi$ -angle of GLY is slightly shifted. The  $\phi$ -angle of PRO does not change due to its ring structure, whereas the  $\psi$ -angle shows a second state around  $330^\circ$ .
