# Supplementary material for: Mechanism of collagen folding propagation studied by Molecular Dynamics simulations
Source: PubMed Central journal article supplement (PMC8224937; doi:10.1371/journal.pcbi.1009079), 2021-06-08
Supplement: pcbi.1009079.s010.pdf [file pcbi.1009079.s010.pdf]

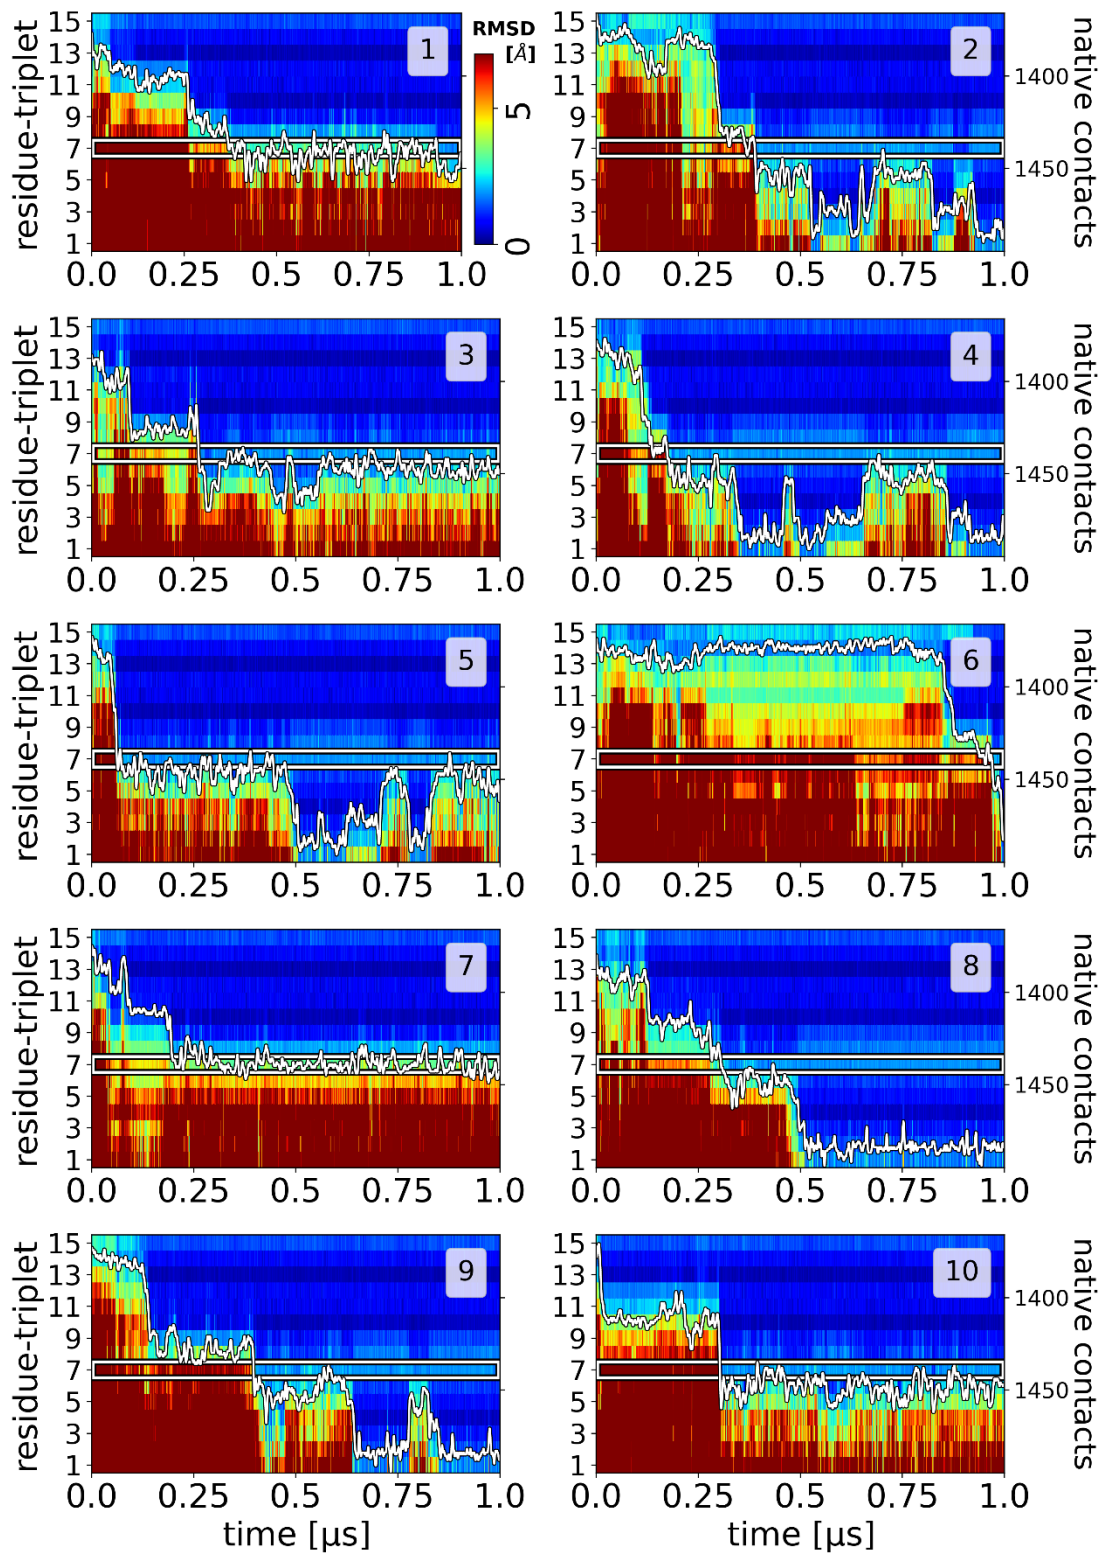

**S10\_Fig.** RMSD of residue triplets of all simulations with a single G7aT mutation (marked by white frame). The simulation starts from an unfolded collagen peptide with an already formed nucleus at the C-terminus (top). See legend of S9\_Fig.
