# Supplementary material for: Mechanism of collagen folding propagation studied by Molecular Dynamics simulations
Source: PubMed Central journal article supplement (PMC8224937; doi:10.1371/journal.pcbi.1009079), 2021-06-08
Supplement: pcbi.1009079.s012.pdf [file pcbi.1009079.s012.pdf]

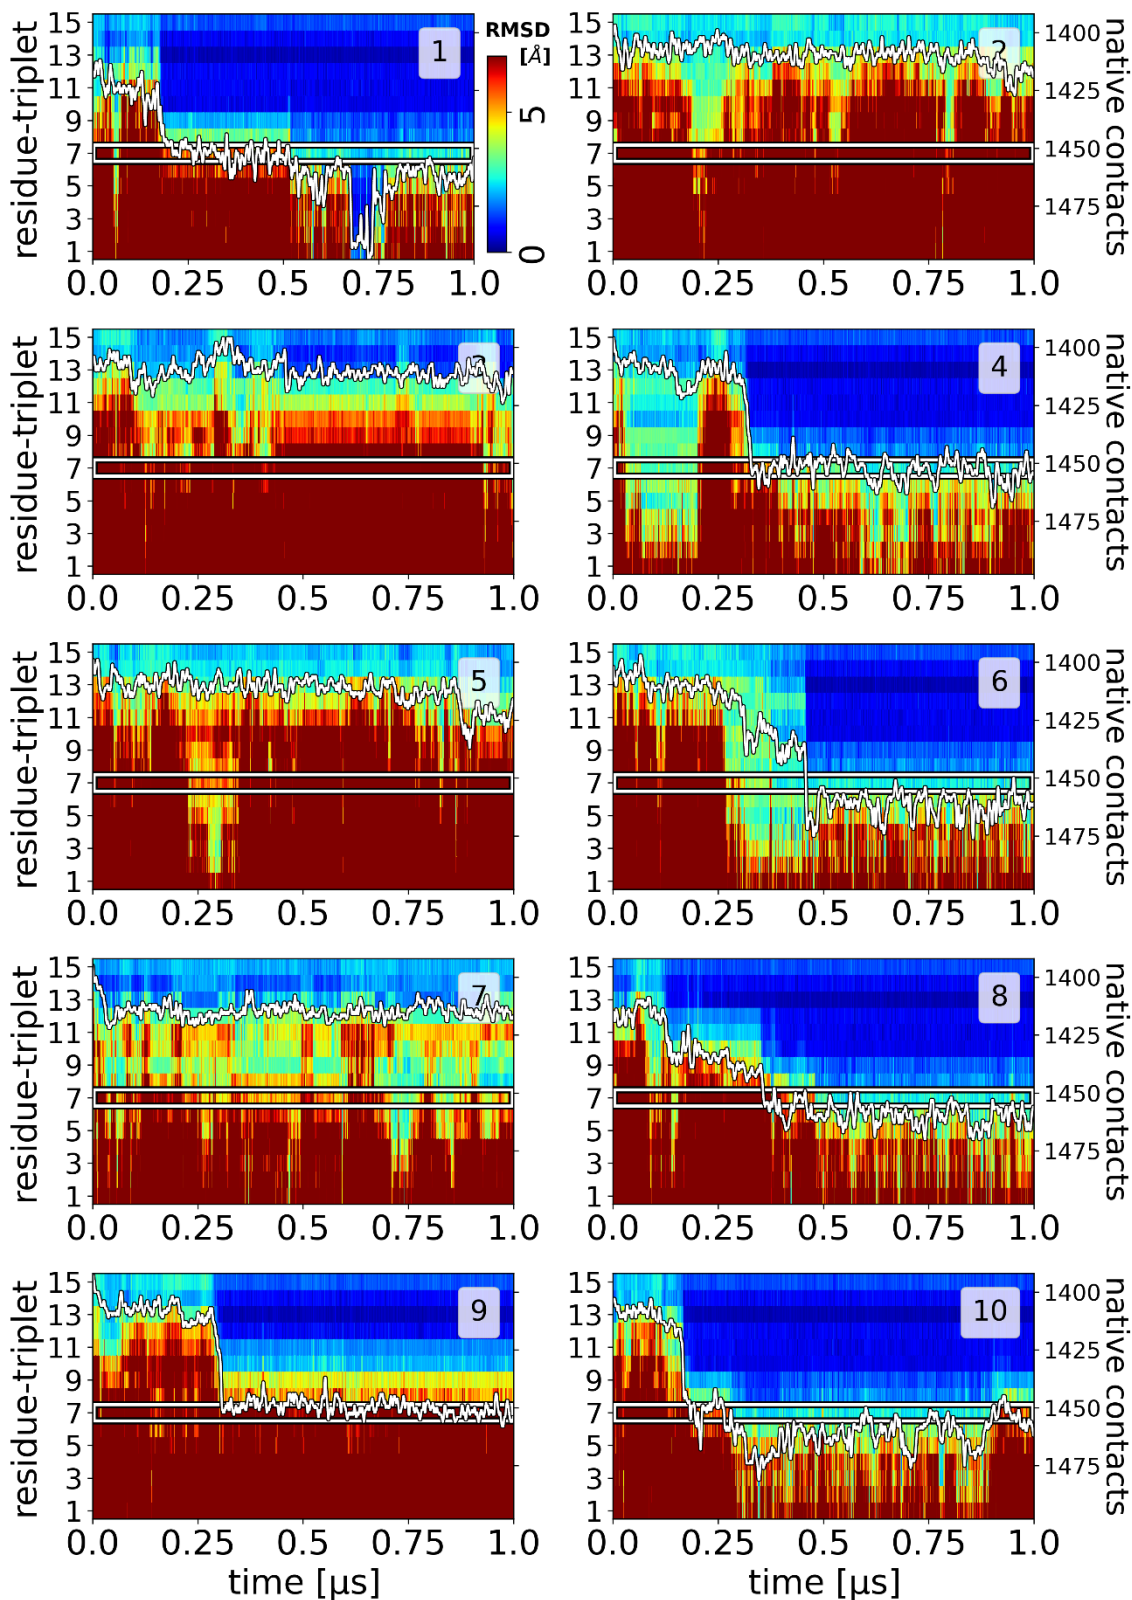

**S12\_Fig.** Same as S11\_Fig but for simulations with three mutations G7abcT (marked by white frame).
